# Supplementary material for: Why to account for finite sites in population genetic studies and how to do this with Jaatha 2.0
Source: PubMed Central journal article supplement (PMC3810865; doi:10.1002/ece3.722), 2013-09-04
Supplement: ece30003-3647-SD1.pdf [file ece30003-3647-SD1.pdf]

# Online Supplement

## S1 Parameter Ranges and Command Lines

### S1.1 Basic Demographic model

The data sets were simulated with  $nLoci$  loci. The population mutation parameter  $\theta$  (per locus) and the recombination rate  $\rho$  (per locus) were drawn uniformly from the given parameter ranges. The other parameters were chosen uniformly from the following ranges after log transformation:

**population-scaled mutation rate**  $\theta \in [5, 20]$

**recombination rate**  $\rho \in [5, 20]$

**size ratios  $q$ ,  $s_1$  and  $s_2$**   $\in [0.05, 10]$

**migration rate**  $m \in [0.005, 5]$

**divergence time**  $\tau \in [0.017, 20]$

**ms command line** (Hudson 2002)

```
ms 50  $nLoci$  -t  $\theta$  -r  $\rho$  1000 -I 2 25 25 -m 1 2  $m$  -m 2 1  $m$  -n 2  $q$  -eN  $\tau$  ( $s_1+s_2$ )  
-ej  $\tau$  2 1 -g 1  $\frac{\log(\frac{1}{s_1})}{\tau}$  -g 2  $\frac{\log(\frac{q}{s_2})}{\tau}$ 
```

### S1.2 Decreasing Migration Model

For the "Decreasing Migration" model, the parameter values for  $\theta$ ,  $m$ ,  $\rho$ ,  $q$ ,  $s_1$ ,  $s_2$  were chosen as in the basic model (Sect. S1.1). The data sets were simulated with  $nLoci$  loci with the following two additional parameters drawn uniformly from the parameter ranges after log transformation:

**times  $\tau_m$  and  $\tau_0$**   $\in [0.017, 15]$

The divergence time  $\tau$  is the sum of the time with ( $\tau_m$ ) and without ( $\tau_0$ ) gene flow.

**ms command line** (Hudson 2002)

```
ms 50  $nLoci$  -t  $\theta$  -r  $\rho$  1000 -I 2 25 25 -m 1 2 0 -m 2 1 0  
-em  $\tau_0$  1 2 ( $0.5 \cdot m$ ) -em  $\tau_0$  2 1 ( $0.5 \cdot m$ ) -em ( $0.5 \cdot \tau_m + \tau_0$ ) 1 2  $m$   
-em ( $0.5 \cdot \tau_m + \tau_0$ ) 2 1  $m$  -n 2  $q$  -eN  $\tau$  ( $s_1+s_2$ ) -ej  $\tau$  2 1 -g 1  $\frac{\log(\frac{1}{s_1})}{\tau}$  -g 2  $\frac{\log(\frac{q}{s_2})}{\tau}$ 
```

### S1.3 Finite-Sites Mutation Models

All parameters were chosen as described in the case of the "Basic Model" (Sect. S1.1) with one additional parameter uniformly drawn on the logarithmic scale:

**$\Gamma$ -shape parameter**  $\alpha \in [0.001, 2.5]$

The `ms` and `seq-gen` command lines for a HKY model are shown for the "Basic Model", where  $L$  is the sequence length being simulated,  $T$  is the factor of the divergence time to the outgroup,  $ti/tv$  is the transition transversion ratio, and  $\alpha$  the  $\Gamma$ -shape parameter. The base frequencies following the `-f` option were always set to the values observed in the tomato loci. The output of `ms` is a file called "treeFile" which serves as an input for `seq-gen`.

### ms (Hudson 2002) and seq-gen (Rambaut and Grassly 1997) command lines

```
ms (50+1) nLoci -r  $\rho$  L -I 3 25 25 1 -m 1 2 m -m 2 1 m -n 2 q -eN  $\tau$  ( $s_1+s_2$ )
-ej  $T*\tau$  3 1 -ej  $\tau$  2 1 -g 1  $\frac{\log(\frac{1}{s_1})}{\tau}$  -g 2  $\frac{\log(\frac{q}{s_2})}{\tau}$  -T | tail -n +4 | grep -v //
> treeFile
seq-gen -mHKY -l L -s  $\frac{\theta}{L}$  -p (L+1) -t  $ti/tv$  -f 0.26 0.20 0.22 0.32 -a  $\alpha$  <
treeFile
```

As the frequency of back-mutations and double hits not only depends on the average mutation rate but also on the transition-transversion ratio and the heterogeneity of mutation rates across sites, we used the HKY+ $\Gamma$  substitution model (Hasegawa et al. 1985; Yang 1996). For three values of  $ti/tv$  (1,2,5), ten sequence files each were simulated with 100 loci and 25 samples per population under the “FixedS2+ $\Gamma$ ” model with the *Solanum* base frequencies and  $T = 2$  (Jaatha settings J4 in S1). Parameter values for  $\theta$ ,  $q$ ,  $\tau$ ,  $m$ , and  $\alpha$  were uniformly drawn from the log-scaled parameter range given in Section S1.3. We fixed the values of  $ti/tv$  in Jaatha to the true  $ti/tv$  values with which the data sets were simulated. Only 30 data sets were used in this analysis because including  $\alpha$  estimation increases the run time of the sequence simulator. Jaatha was run with the 30 SS described in Section S3 ( $n_{SS} = 30$ ). For a comparison, we also estimated parameters with the ISM with similar settings (J5 and J6 in S1).

## S2 Optimization of Jaatha Settings

To test the influence of six different Jaatha options ( $k$ ,  $s_{ini}$ ,  $s_{main}$ ,  $r$ ,  $\epsilon$ , and  $w$ ) on the accuracy and the run time, we conducted an analysis in which the two parameters  $\theta$  and  $\tau$  were estimated with the following parameters of the basic model fixed to values previously estimated for the tomato data (Naduvilezhath et al. 2011):  $s_1 = 1$ ,  $s_2 = 0.3$ ,  $m = 0.5$ ,  $q = 4.5$ , and  $\rho = 20$  which is the population recombination rate per locus also scaled with  $4N_e$ . The data sets consisted of 100 loci simulated under an ISM with 25 samples per population. Four values each of  $\tau$  and of  $\theta$  were chosen on a uniform grid from the log-transformed parameter range described in Section S1.1. For each of the above mentioned settings three values were tested:  $k \in \{2, 3, 4\}$ ,  $s_{ini} \in \{100, 200, 300\}$ ,  $s_{main} \in \{200, 400, 600\}$ ,  $r \in \{0.05, 0.1, 0.2\}$ ,  $\epsilon \in \{0.5, 1, 2\}$ , and  $w \in \{0.7, 0.9, 1\}$ . Each of the 729 ( $= 3^6$ ) program-setting combinations were tested on 16 data sets (one for each  $\theta$ - $\tau$  combination) such that in total 11,664 runs were evaluated. The other Jaatha settings were kept fixed at  $n_{SS} = 23$ ,  $t_{stop} = 5$ ,  $n_{loc} = 70$ ,  $n_B = 10$ ,  $ext_\theta = true$ ,  $s_{final} = 200$ ,  $t_{max} = 200$ , and  $n_{RP} = 10$ . The accuracy was measured for each parameter  $p \in \{\theta, \tau\}$  in terms of the root mean squared error (RMSE) between the simulated  $p_{true}$  and estimated value  $p_{est}$ :

$$RMSE(p) = \frac{\sqrt{(p_{est} - p_{true})^2}}{p_{true}} \quad (2)$$

Decreasing the size of the parameter range from which random samples were chosen for the simulations ( $r$ ) had the greatest influence on precision of the estimates of  $\tau$  (A 1(a)), but run time increased from an average of 30 minutes for  $r=2$  to 40 minutes for  $r=0.05$  (CPU time on a single kernel of a Quad-Core AMD Opteron with 2.7 GHz). The same effect is captured in a simple linear model in which the run time is the response variable and the different settings the explanatory ones. Decreasing the threshold for the stopping criterion ( $\epsilon$ ) also had a small positive effect, which is barely visible in Figure A 1(b). The number of simulations  $s_{ini} \in [100, 300]$  and  $s_{main} \in [200, 600]$  in Jaatha showed almost

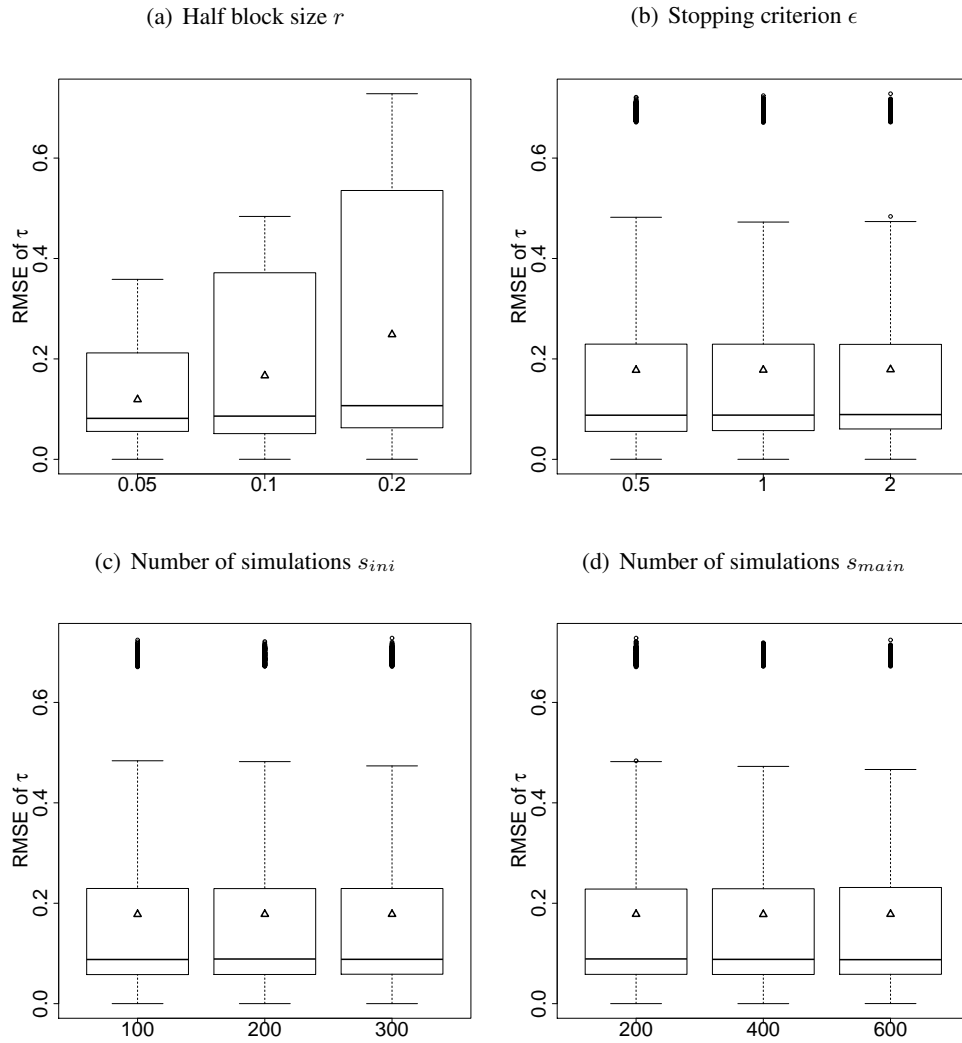

Figure S1: **Influence of Jaatha settings on RMSE of divergence time  $\tau$ .** The mean RMSE is depicted as  $\Delta$ . Decreasing the size of the parameter range of the simulation area ( $r$ ) increases the precision of  $\tau$  estimation. For the other three settings, little effect on RSME could be observed, although decreasing  $r$  or  $\epsilon$  increases run time (data not shown).

no effect on run time and, surprisingly, on the accuracy in the explored ranges (A 1(c) and A 1(d)). Nevertheless other Jaatha runs show that increasing the number of simulations helps for convergence, and therefore increasing the number of simulations especially in the refined search ( $s_{main}$ ), is recommended. The RMSE of  $\tau$  increased drastically as the true divergence time increased (S4). In the two-parameter scenario, decreasing the weights ( $w$ ) of old simulation blocks or dividing the parameter space into more starting blocks ( $k$ ) influenced neither the RMSE of the estimates, nor the run time. The effects on the estimation of  $\theta$  were similar to the ones described for  $\tau$  although RMSE was lower.

Hence if a fast but accurate search is to be conducted, the following settings are appropriate:  $s_{ini} = 100$ ,  $s_{main} = 200$ ,  $r = 0.05$  (or even smaller),  $k = 2$  or  $3$  (depending on the dimension of the parameter range), and  $\epsilon = 2$ . However, we point out that including additional parameters adds an extra dimension to the parameter space and advise choosing Jaatha settings after a series of trial runs on simulated data.

### S3 Choice of Summary Statistics

We define seven additional SS, which are believed to be sensitive for detecting recurrent mutations, and we evaluate whether including these additional SS improves the accuracy ( $n_{SS} = 30$ ). These SS were defined as the number of positions which contained

$S_{24}$ : three base types in population  $P_1$  or three base types in population  $P_2$

$S_{25}$ : four base types in population  $P_1$  or four base types in population  $P_2$

$S_{26}$ : transitions within one population and transversion to outgroup

$S_{27}$ : transitions in both populations and transversion to outgroup

$S_{28}$ : transversions within one population and transition to outgroup

$S_{29}$ : transversions in both populations and transition to outgroup

$SS_{30}$ : a base present in at least 95% of the samples in one population and in the other population in at most 5% of the samples

The summary statistics  $SS_{24}$ - $SS_{29}$  should contain information about the divergence of the two species and  $SS_{30}$  about recent migration events. To compare the performance of the 23 original SS  $SS_1, \dots, SS_{23}$  with the extended set  $SS_1, \dots, SS_{30}$  and to decide whether to set the option  $ext_\theta$ , we simulated 25 genealogies with 100 loci each under the “FixedS2” model and  $T = 2$ . Sequences of 1 kb in length and with two repetitions were generated using the HKY +  $\Gamma$  model with the *Solanum* base frequencies,  $t_i/t_v = 3$ , and  $\alpha = 0.7$ . The four parameters to estimate were  $\theta$ ,  $q$ ,  $m$ , and  $\tau$ . The initial search phase however, was only conducted with  $n_{SS} = 23$  and for the refined search the same starting points were chosen for the run with  $n_{SS} = 23$  and  $n_{SS} = 30$ . The Jaatha settings  $\mathcal{J}2$  and  $\mathcal{J}3$  with the appropriate  $n_{SS}$  were used (Tab. S1).

Additionally, we evaluated whether  $\theta$  could be calculated proportionally to the number of observed segregating sites ( $ext_\theta = \text{TRUE}$ ; see Naduvilezhath et al. 2011) under an FSM, or if  $\theta$  should be estimated within Jaatha as well ( $ext_\theta = \text{FALSE}$ ), hence increasing the number of dimensions and run time. Including  $\theta$  into the optimization range improved the estimates (cp. in Fig. S2 results marked with “ext” and without). The inclusion of additional SS increased the precision in  $\theta$  and  $q$  estimates only in the case when  $\theta$  was calculated externally ( $ext_\theta$ ). However, there was no improvement in the estimations of divergence time  $\tau$  or the migration rate  $m$ .

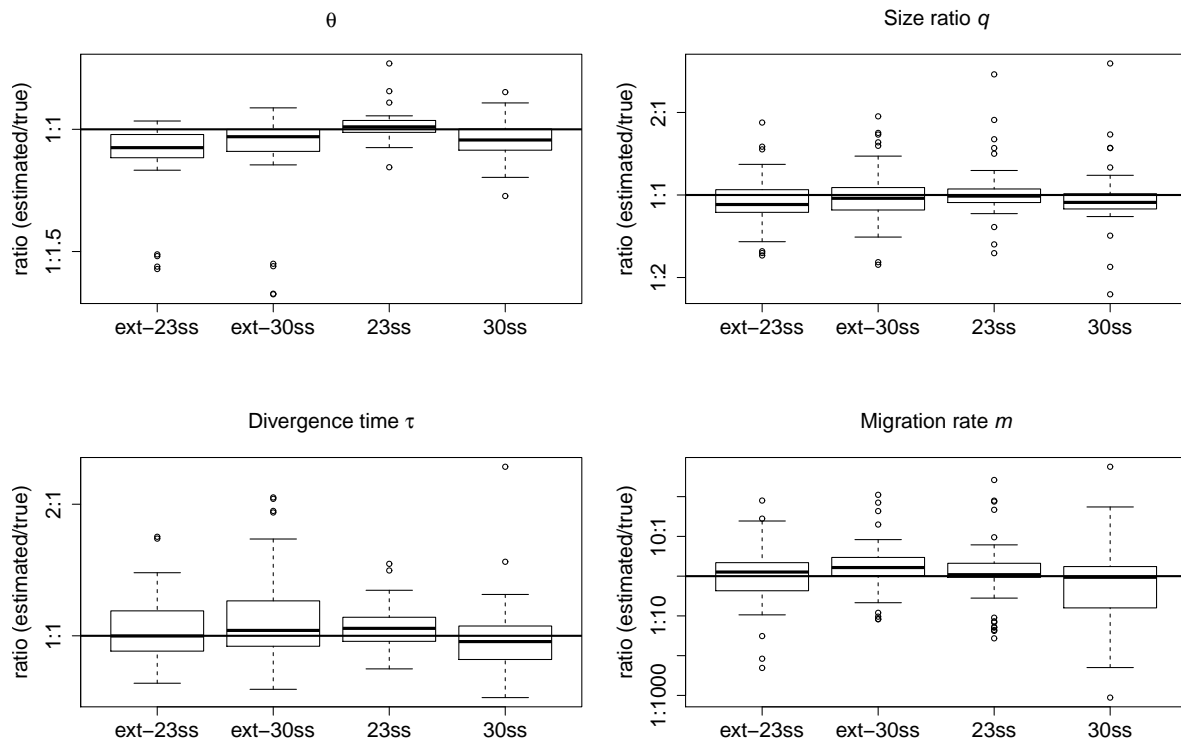

Figure S2: **Comparing different numbers of SS and Jaatha setting  $ext_{\theta}$ .** Here we compared the usage of 23 and 30 summary statistics (SS) on the same 25 genealogies (each with two finite-sites sequence simulator runs). Additionally, we assessed the effect of setting the Jaatha option  $ext_{\theta}$ , *i.e.* either estimating  $\theta$  outside of the simulation range (marked with "ext"; as in Naduvilzhath et al. 2011) or included  $\theta$  into Jaatha's optimization range. The best overall results were obtained when  $\theta$  was included in the parameter optimization range and using 23 SS. However, when the option  $ext_{\theta}$  was used, including additional SS improved the estimates of  $\theta$  and  $q$ .

|              |    |              |    |   |    |   |    |    |   |   |
|--------------|----|--------------|----|---|----|---|----|----|---|---|
|              | 10 | 16           | 19 |   | 21 |   | 23 |    |   |   |
|              | 9  | 5            | 12 |   | 11 |   | 15 | 22 |   |   |
|              | 8  |              |    |   |    |   |    |    |   |   |
|              | 7  |              |    |   |    |   |    |    |   |   |
|              | 6  |              |    |   |    |   |    |    |   |   |
| population 2 | 5  | 3            | 8  |   | 14 |   | 10 | 20 |   |   |
|              | 4  |              |    |   |    |   |    |    |   |   |
|              | 3  |              |    |   |    |   |    |    |   |   |
|              | 2  | 1            | 7  |   | 9  |   | 13 | 18 |   |   |
|              | 1  |              |    |   |    |   |    |    |   |   |
|              | 0  |              | 2  |   | 4  |   | 6  | 17 |   |   |
|              |    | 0            | 1  | 2 | 3  | 4 | 5  | 6  | 7 | 8 |
|              |    | population 1 |    |   |    |   |    |    |   |   |

Figure S3: **The 23 summary statistics used in this study for example with  $y_1 = y_2 = 10$ .** The  $A_i$  were further refined for low frequency and high frequency variants whereas middle frequency variants were more coarsely binned. For a general description of the  $A_i$  please refer to Naduvilezhath et al. (2011).

#### S4 Additional Tables and Figures

Table S1: **Jaatha settings** used for the different analyses. The columns stand for the following settings in Jaatha (for more detailed explanation see section describing the new Jaatha version):  $k$ - number of (#) intervals each of the  $n$  dimensions is divided into (results in  $k^{\text{th}}$  start blocks),  $s_{\text{ini}}$ -# simulations per block in the initial search,  $s_{\text{main}}$ -# simulations per block in the refined search,  $r$ -half side length of the blocks in refined search,  $\epsilon$ -score difference required for stopping,  $n_{\text{RPP}}$ -# best start points,  $n_{\text{SS}}$ -# summary statistics,  $\text{ext}_{\theta}$ -TRUE:  $\theta$  is calculated outside of the block during refined search and -FALSE:  $\theta$  is calculated like the other parameters,  $M_{\text{ini}}$ -mutation model for initial search,  $M_{\text{main}}$ -mutation model for refined search,  $s_{\text{final}}$ -# simulations for the calculation of likelihoods,  $t_{\text{max}}$ -maximum # steps during refined search,  $\text{scale}$ -only  $\frac{1}{\text{scale}}$  of the loci are simulated and the JSFS is extrapolated accordingly. Weight  $w$  was always kept at 0.9, # steps  $t_{\text{stop}}$  in which there was no score change of at least  $\epsilon$  at 5, # simulated loci  $n_{\text{loc}}$  for the GLM fittings at 70, and # best parameter combinations  $n_B$  kept in each  $\mathcal{L}$  list at 10.

| Reference | $k$ | $s_{\text{ini}}$ | $s_{\text{main}}$ | $r$  | $\epsilon$ | $n_{\text{RPP}}$ | $n_{\text{SS}}$ | $\text{ext}_{\theta}$ | $M_{\text{ini}}$ | $M_{\text{main}}$ | $s_{\text{final}}$ | $t_{\text{max}}$ | $\text{scale}$ |
|-----------|-----|------------------|-------------------|------|------------|------------------|-----------------|-----------------------|------------------|-------------------|--------------------|------------------|----------------|
| J1        | 3   | 200              | 200               | 0.05 | 1          | 10/16            | 23              | TRUE                  | IS               | IS                | 200                | 200              | 1              |
| J2        | 3   | 100              | 200               | 0.05 | 2          | 4                | 23/30           | TRUE                  | FS               | FS                | 100                | 200              | 1              |
| J3        | 3   | 300              | 200               | 0.05 | 2          | 10               | 23/30           | FALSE                 | FS               | FS                | 100                | 170              | 1              |
| J4        | 2   | 300              | 200               | 0.1  | 2          | 10               | 23              | FALSE                 | FS               | FS                | 100                | 170              | 1              |
| J5        | 2   | 300              | 200               | 0.1  | 2          | 8                | 23              | FALSE                 | IS               | IS                | 100                | 170              | 1              |
| J6        | 3   | 300              | 400               | 0.1  | 2          | 10               | 23              | FALSE                 | IS               | IS                | 100                | 170              | 1              |
| J7        | 3   | 300              | 200               | 0.1  | 2          | 16/10            | 23              | FALSE                 | FS               | FS                | 200                | 170              | 1              |
| J8        | 3   | 300              | 200               | 0.1  | 2          | 9                | 23              | FALSE                 | IS               | FS                | 200                | 170              | 1              |
| J9        | 3   | 300              | 200               | 0.05 | 2          | 16               | 23              | FALSE                 | IS               | FS                | 100                | 170              | 1              |
| J10       | 3   | 300              | 200               | 0.05 | 2          | 16               | 23              | FALSE                 | IS               | IS                | 200                | 170              | 1              |
| J11       | 3   | 300              | 200               | 0.1  | 2          | 16               | 23              | FALSE                 | IS               | FS                | 200                | 170              | 1              |
| J12       | 3   | 200              | 300               | 0.05 | 1          | 16               | 23              | FALSE                 | IS               | FS                | 300                | 170              | 1              |
| J13       | 2   | 400              | 300               | 0.1  | 2          | 16               | 23              | FALSE                 | FS               | FS                | 300                | 170              | 1              |
| J14       | 3   | 200              | 500               | 0.05 | 0.5        | 40               | 23              | TRUE                  | IS               | IS                | 200                | 200              | 1              |
| J15       | 2   | 300              | 200               | 0.1  | 2          | 16               | 23              | FALSE                 | FS               | FS                | 100                | 170              | 1              |
| J16       | 3   | 400              | 200               | 0.1  | 2          | 16               | 23              | FALSE                 | IS               | FS                | 300                | 170              | 1              |
| J17       | 3   | 200              | 200               | 0.05 | 50         | 4                | 23              | TRUE                  | FS               | FS                | 200                | 200              | 250            |
| J18       | 3   | 200              | 200               | 0.05 | 25         | 4                | 23              | TRUE                  | ISM              | ISM               | 200                | 200              | 250            |

Table S2: Estimated parameter values for the seven *S. peruvianum* and *S. chilense* loci with alternative settings under three different models.  $\theta_{site}$ ,  $m$  and  $\tau$  are scaled with  $4N_1$ , where  $N_1$  is the effective population size of *S. chilense*. Bold values are fixed parameter values for the estimation. The corresponding Jaatha settings can be found in S1.

| Model             | $\theta_{site}$ | $q$  | $m$  | $\tau$ | $s_1$    | $s_2$      | $\alpha$   | # Parameters | log-Likelihood | Settings |
|-------------------|-----------------|------|------|--------|----------|------------|------------|--------------|----------------|----------|
| (IS) FixedS2      | 0.010           | 4.98 | 0.59 | 0.38   | <b>1</b> | 0.29       | -          | 5            | $-\infty$      | J14      |
| FixedS2+ $\Gamma$ | 0.010           | 7.07 | 0.35 | 0.26   | <b>1</b> | <b>0.3</b> | 2.5        | 5            | -76.2          | J15      |
| BothGrowMig       | 0.010           | 4.23 | 0.73 | 0.57   | 0.41     | 0.05       | <b>0.7</b> | 6            | -97.7          | J16      |



Table S3: **Jaatha settings and run times** for *Solanum* analyses. The CPU time on a single processor Quad-Core AMD Opteron kernel is reported.

| Model                   | Settings | Run time [h] |
|-------------------------|----------|--------------|
| NoMig                   | J8       | 35           |
| NoMig+ $\Gamma$         | J7       | 109          |
| FixedS2                 | J9       | 83           |
| (IS) FixedS2            | J10      | 2            |
| FixedS2+ $\Gamma$       | J7       | 186          |
| SingleGrowMig           | J11      | 84           |
| SingleGrowMig+ $\Gamma$ | J7       | 386          |
| BothGrowNoMig           | J11      | 35           |
| BothGrowNoMig+ $\Gamma$ | J7       | 322          |
| BothGrowMig             | J12      | 105          |
| BothGrowMig             | J16      | 72           |
| BothGrowMig+ $\Gamma$   | J13      | 194          |
| DecMig                  | J9       | 101          |
| (IS) DecMig             | J1       | 19           |

Table S4: **Parameter estimates for *A. thaliana* using ISM.** Jaatha's estimates using the ISM for the mutation rate  $\theta$ , time  $\tau$  of the split of both demes, the subsequent migration rate  $m$  between populations, and the rate heterogeneity parameter  $\alpha$ . The parameter  $\tau$  is scaled in  $2N_e$  generations,  $m$  is twice the number of immigrants to each deme per generation, and  $\theta$  is  $2N_e$  times the mutation rate per base.

|                  | $\tau$ | $m$  | $\theta_{site}$      |
|------------------|--------|------|----------------------|
| complete dataset | 0.27   | 3.17 | $3.23 \cdot 10^{-3}$ |
| FS only          | 0.24   | 3.59 | $2.40 \cdot 10^{-3}$ |
| Th only          | 0.24   | 3.61 | $3.56 \cdot 10^{-3}$ |
| NC only          | 0.22   | 3.12 | $4.07 \cdot 10^{-3}$ |

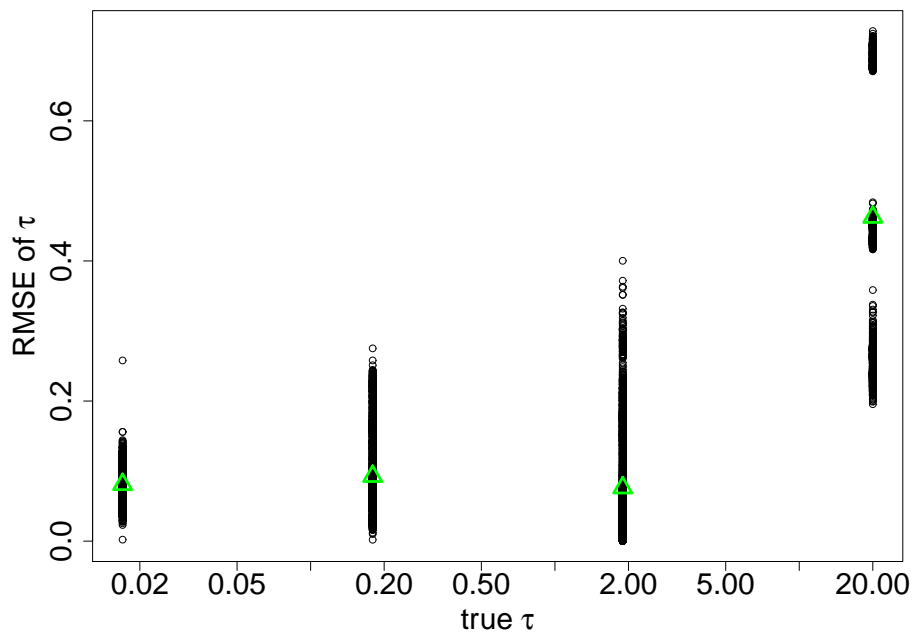

Figure S4: **Jaatha becomes imprecise when estimating large divergence times ( $\tau = 20$ ).** The true value of the divergence time  $\tau$  is plotted against the RMSE of  $\tau$  ( $\circ$ ). The average value is shown as  $\triangle$ . As  $\tau$  gets larger Jaatha has trouble estimating the correct value of  $\tau$ .

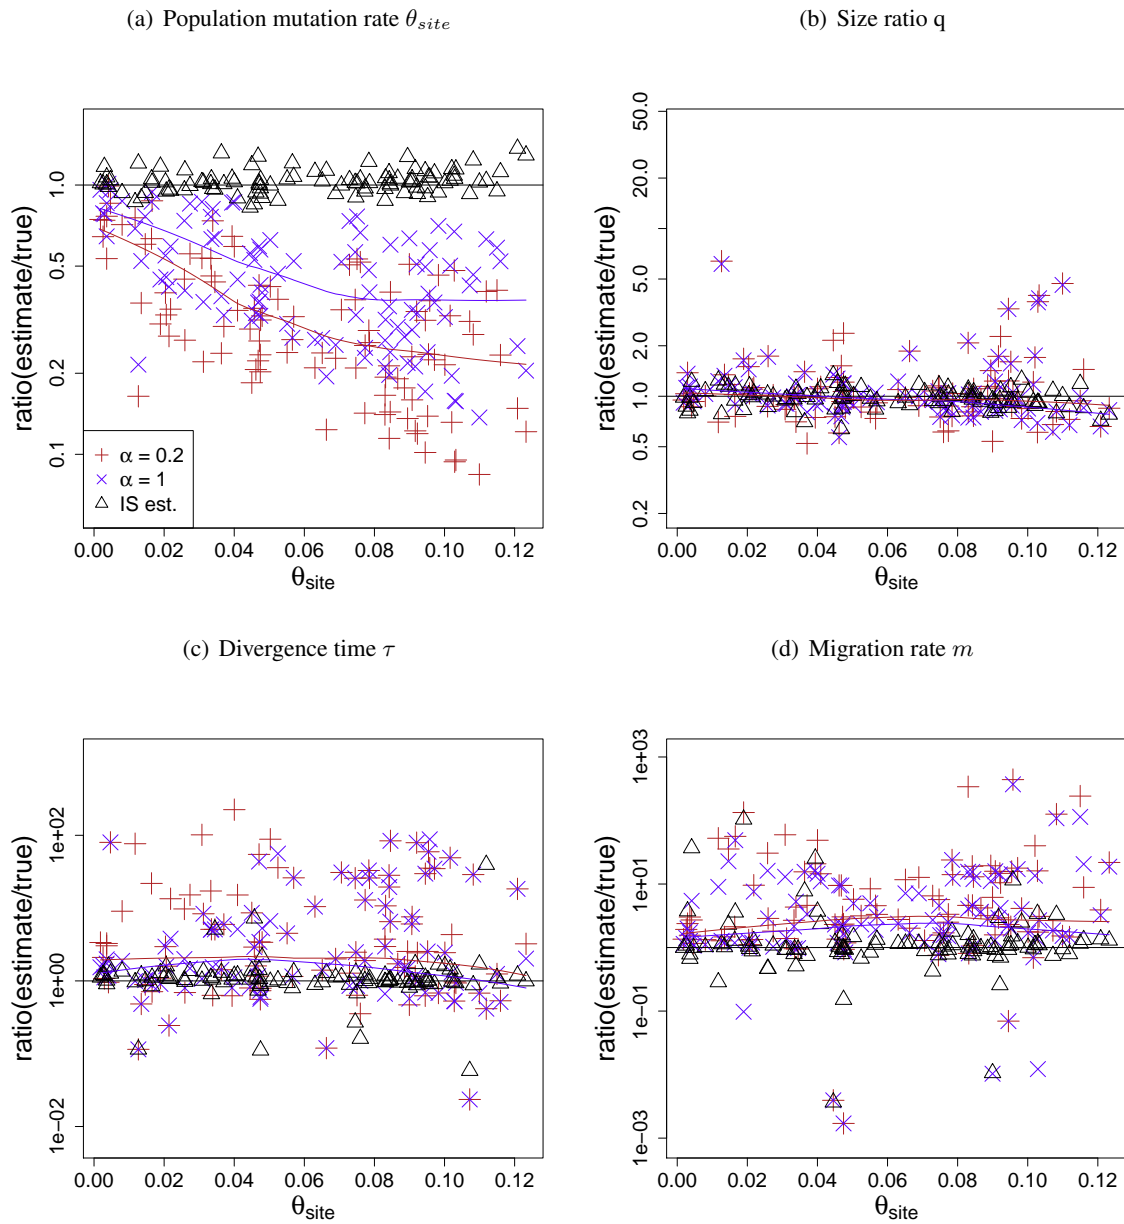

Figure S5: **The effect of neglecting finite sites on parameter estimation under the "Constant" model.** The ratio of estimated and true values of  $\theta$ ,  $q$ ,  $\tau$ , and  $m$  plotted against true  $\theta$  values under infinite-sites assumptions and the "Constant" model. Shown are the data sets simulated with the most extreme  $\alpha$  values ( $\alpha = 0.2$  and  $1$ ),  $t_i/t_v = 2$ ,  $T = 3$ . As a comparison, estimates for infinite-sites data sets ( $\triangle$ ) are included. The lines plotted are polynomial regression lines fitted to the ratios (with *lowess* function of R).

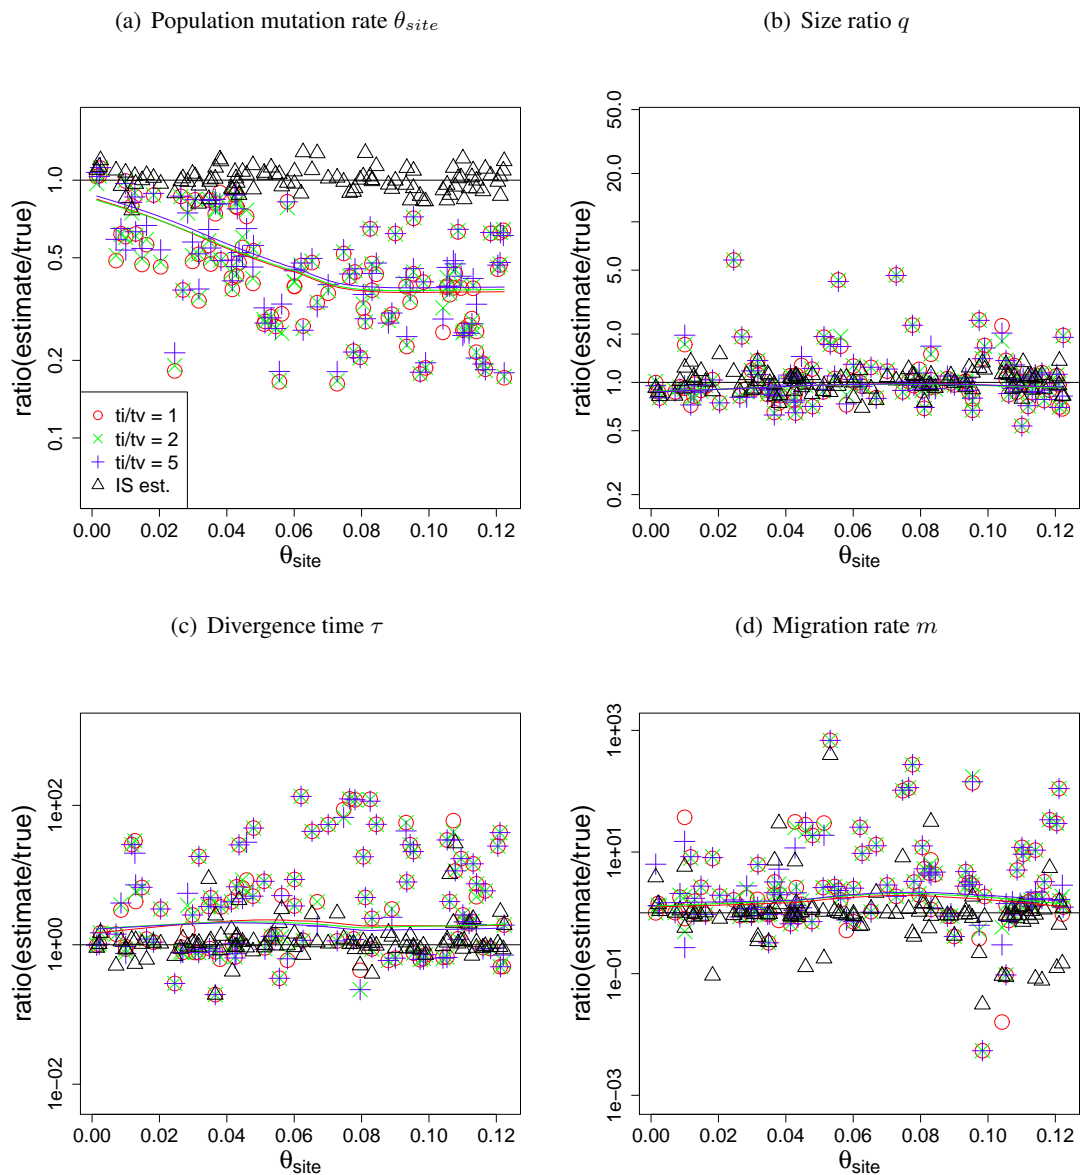

Figure S6: **Different transition-transversion ratios have almost no influence on the estimations.** The ratio of estimated and true values of  $\theta$ ,  $q$ ,  $\tau$ , and  $m$  plotted against the true  $\theta$  values under infinite-sites assumptions for three different values of  $t_i/t_v$  (1, 2, 5). The data were simulated with a finite-sites model with  $\alpha = 1$  and  $T = 6$  under the "Constant" model. As a comparison, estimates for infinite-sites data sets ( $\Delta$ ) are included. The lines plotted are polynomial regression lines fitted to the ratios (with *lowess* function of R).
